# Supplementary material for: Selective detection of trinitrophenol by a Cd(ii)-based coordination compound
Source: Royal Society of Chemistry journal article supplement (doi:10.1039/c9ra08614e), 2019-01-01
Supplement: c9ra08614e1.pdf [file c9ra08614e1.pdf]

## Selective detection of trinitrophenol by a Cd(II)-based coordination compound

Basudeb Dutta,<sup>a</sup> Rakesh Purkait,<sup>b</sup> Suprava Bhunia,<sup>b</sup> Samim Khan,<sup>a</sup> Chittaranjan Sinha,<sup>b</sup> and  
Mohammad Hedayetullah Mir\*<sup>a</sup>

<sup>a</sup>*Department of Chemistry, Aliah University, New Town, Kolkata 700 156, India. Email:*  
[chmmir@gmail.com](mailto:chmmir@gmail.com)

<sup>b</sup>*Department of Chemistry, Jadavpur University, Jadavpur, Kolkata 700 032, India.*

### Supporting Information

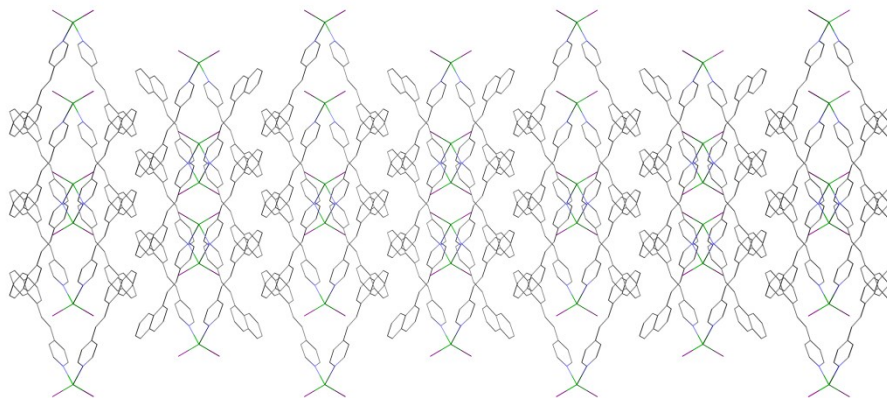

**Fig. S1** 3D supramolecular assembly of compound **1** viewed along *c*-axis.

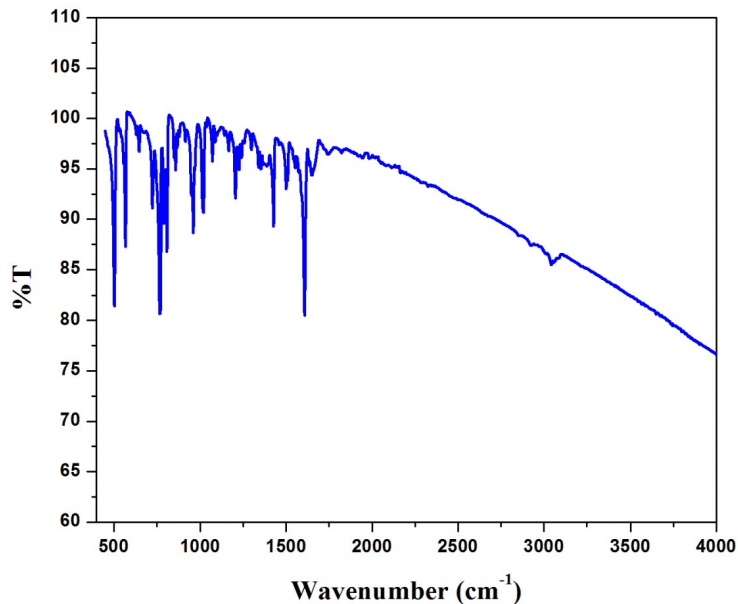

**Fig. S2** FT-IR spectrum of compound **1**.

**Table S1.** Crystal data and refinement parameters for compound **1**

|                                                      |                                     |
|------------------------------------------------------|-------------------------------------|
| Formula                                              | $C_{34}H_{26}CdI_2N_2$ ( <b>1</b> ) |
| fw                                                   | 828.78                              |
| crystalsyst                                          | monoclinic                          |
| space group                                          | $C2/c$                              |
| $a$ (Å)                                              | 28.4498(19)                         |
| $b$ (Å)                                              | 7.4390(5)                           |
| $c$ (Å)                                              | 17.7851(12)                         |
| $\alpha$ (deg)                                       | 90                                  |
| $\beta$ (deg)                                        | 125.191(2)                          |
| $\gamma$ (deg)                                       | 90                                  |
| $V$ (Å <sup>3</sup> )                                | 3076.1(4)                           |
| $Z$                                                  | 4                                   |
| $D_{\text{calcd}}$ (g/cm <sup>3</sup> )              | 1.790                               |
| $\mu$ (mm <sup>-1</sup> )                            | 2.742                               |
| $\lambda$ (Å)                                        | 0.71073                             |
| data[ $I > 2\sigma(I)$ ]/params                      | 2703/177                            |
| GOF on $F^2$                                         | 1.088                               |
| final $R$ indices[ $I > 2\sigma(I)$ ] <sup>a,b</sup> | $R1 = 0.0329$<br>$wR2 = 0.0887$     |

$$^a R1 = \frac{\sum ||F_o| - |F_c||}{\sum |F_o|}, \quad ^b wR2 = \left[ \frac{\sum w(F_o^2 - F_c^2)^2}{\sum w(F_o^2)^2} \right]^{1/2}$$

**Table S2.** Selected bond lengths and bond angles in **1**

|                      |            |                         |            |
|----------------------|------------|-------------------------|------------|
| I(1) - Cd(1)         | 2.6915(4)  | Cd(1)-N(1)-C(5)-C(4)    | 166.6(5)   |
| Cd(1) - N(1)         | 2.306(4)   | C(3)-C(4)-C(5)-N(1)     | 1.0(10)    |
| Cd(1) - N(1)a        | 2.306(4)   | Cd(1)-N(1)-C(1)-H(1)    | 12         |
| I(1) - Cd(1) - N(1)  | 105.24(11) | C(1)-N(1)-C(5)-H(5)     | 179        |
| N(1) - Cd(1) - I(1)a | 110.10(11) | N(1)a-Cd(1)-N(1)-C(1)   | 63.7(4)    |
| Cd(1) - N(1) - C(1)  | 118.4(3)   | I(1)-Cd(1)-N(1)-C(5)    | 5.5(5)     |
| I(1) - Cd(1) - I(1)a | 131.34(2)  | I(1)a-Cd(1)-N(1)-C(5)   | 151.4(4)   |
| N(1)- Cd(1) - N(1)a  | 85.22(16)  | I(1)-Cd(1)-N(1)-C(1)    | 173.3(4)   |
| Cd(1) - N(1) - C(5)  | 123.3(4)   | I(1)a - Cd(1) - N(1)a   | 105.24(11) |
| I(1) - Cd(1) - N(1)a | 110.10(11) | C(15)-C(16)-C(17)-H(17) | 178        |

Symmetry Code: a = 1-x, y, 1/2-z

**Table 3.** Energy of different MOs from DFT calculation

|                                                                                     |                                                                                     |                                                                                       |
|-------------------------------------------------------------------------------------|-------------------------------------------------------------------------------------|---------------------------------------------------------------------------------------|
| 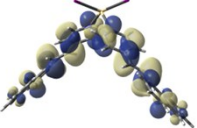  |   |   |
| LUMO<br>-2.72eV                                                                     | LUMO+1<br>-2.7eV                                                                    | LUMO+2<br>-1.7eV                                                                      |
|  |  |  |
| LUMO+3<br>-1.66eV                                                                   | LUMO+4<br>-1.6eV                                                                    | LUMO+5<br>-1.52eV                                                                     |
|  |  |  |
| HOMO<br>-4.93eV                                                                     | HOMO-1<br>-5.23eV                                                                   | HOMO-2<br>-5.44eV                                                                     |
|  |  |  |
| HOMO-3<br>-5.51eV                                                                   | HOMO-4<br>-5.86eV                                                                   | HOMO-5<br>-6.17eV                                                                     |

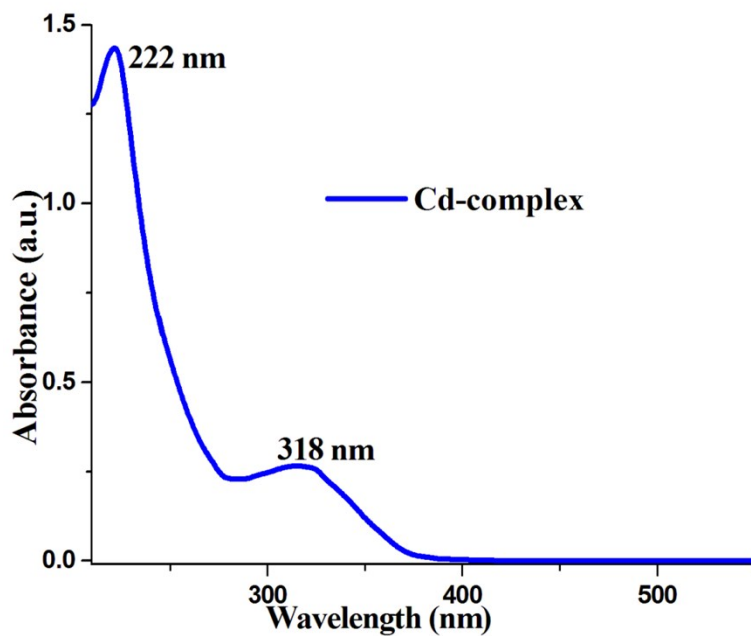

Fig. S3 UV-vis spectrum of **1** in acetonitrile.

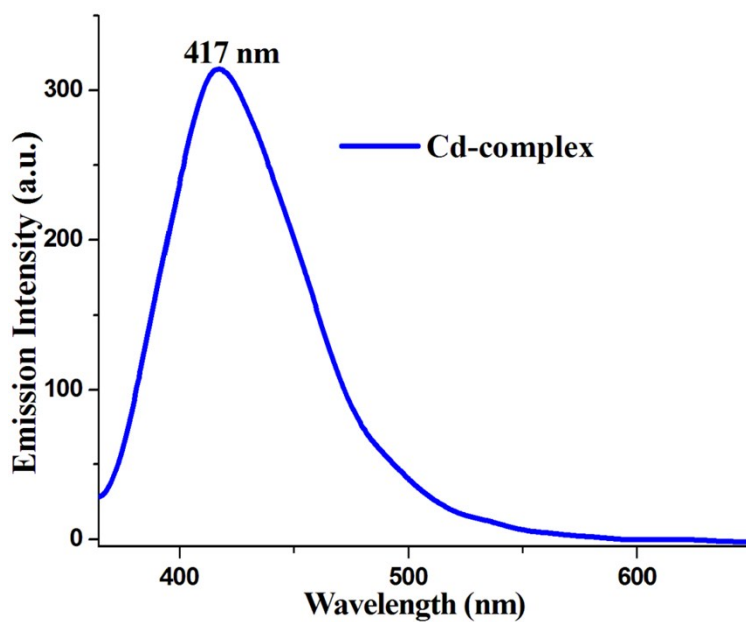

Fig. S4 Fluorescence spectrum of **1** in acetonitrile ( $\lambda_{\text{ex}}$  320).

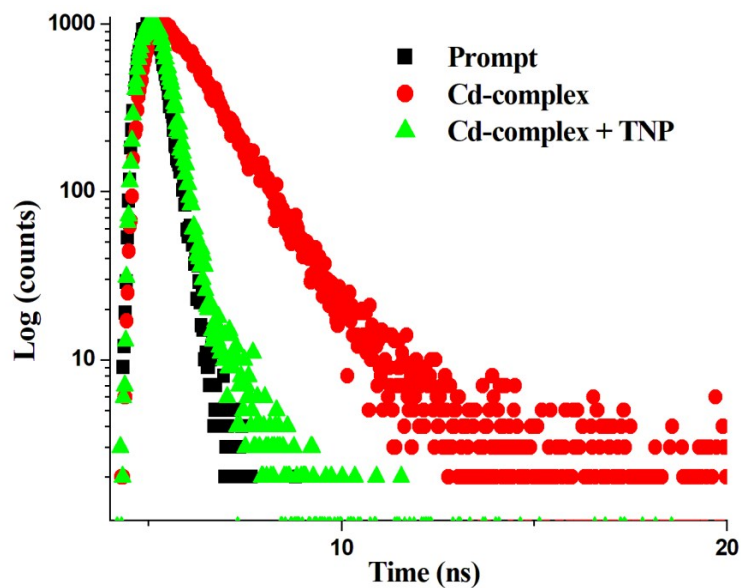

Fig. S5 Fluorescence decay profile of compound **1** and compound **1** with TNP.

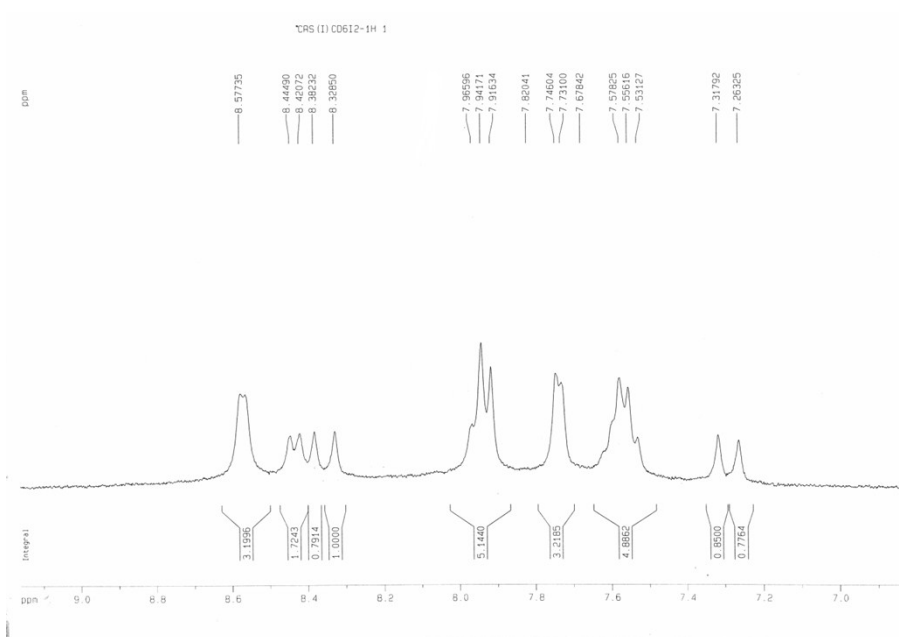

Fig. S6 <sup>1</sup>H NMR spectrum of **1** in DMSO-d<sub>6</sub> solvent.

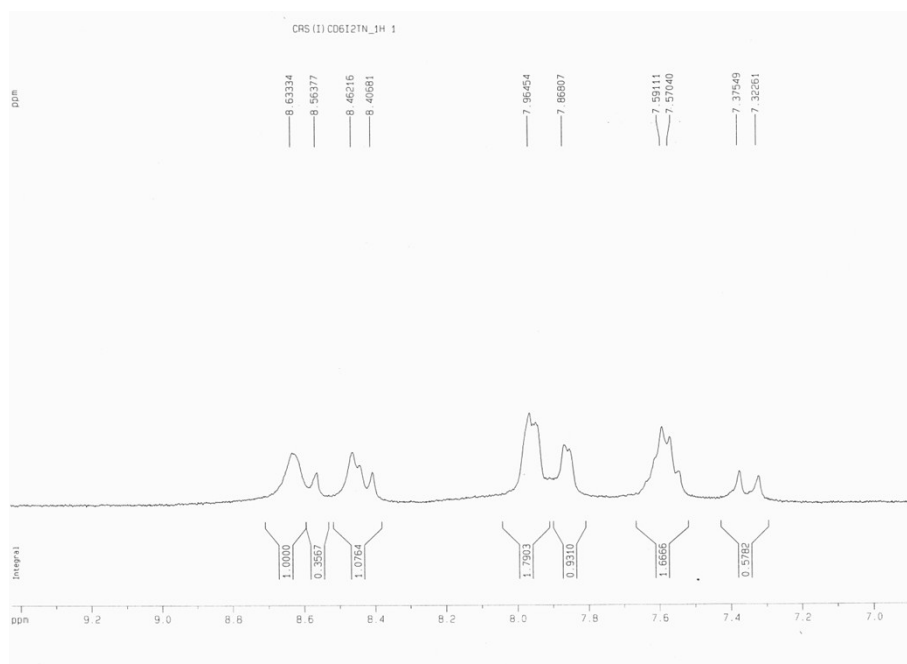

**Fig. S7**  $^1\text{H}$  NMR spectrum of **1** with trinitrophenol (TNP) in  $\text{DMSO-d}_6$ .

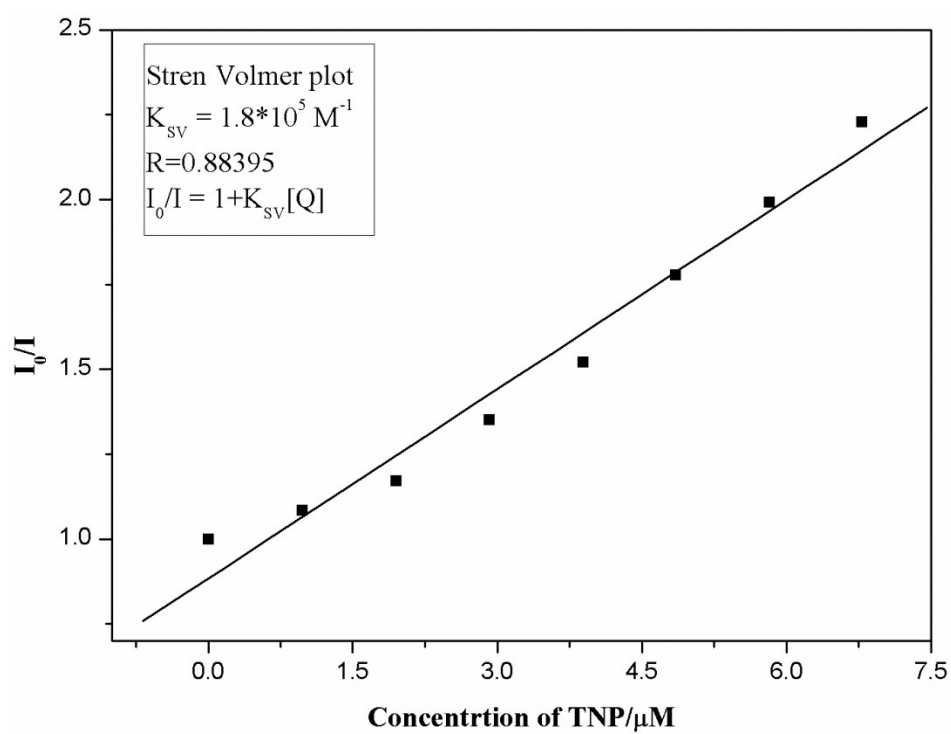

**Fig. S8** Plot of  $I_0/I$  against the concentration of TNP.

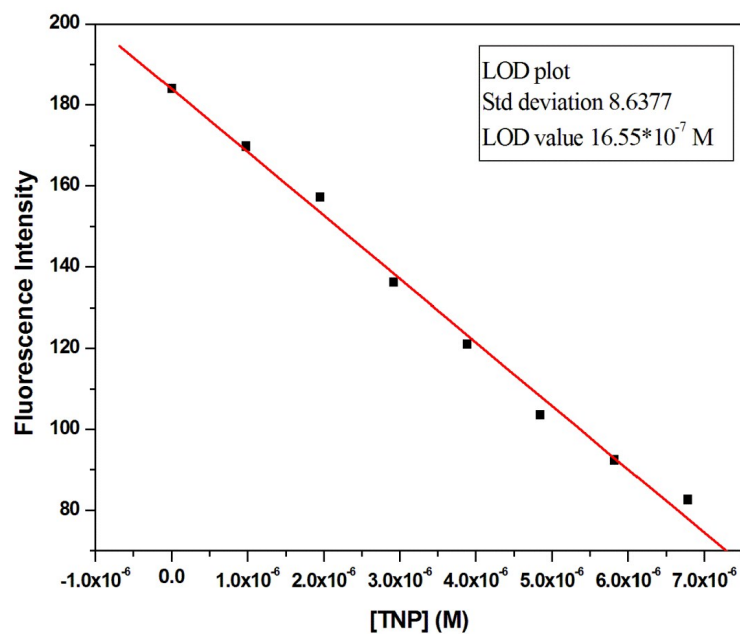

Fig. S9 Limit of detection (LOD) plot for TNP using  $3\sigma$  method.

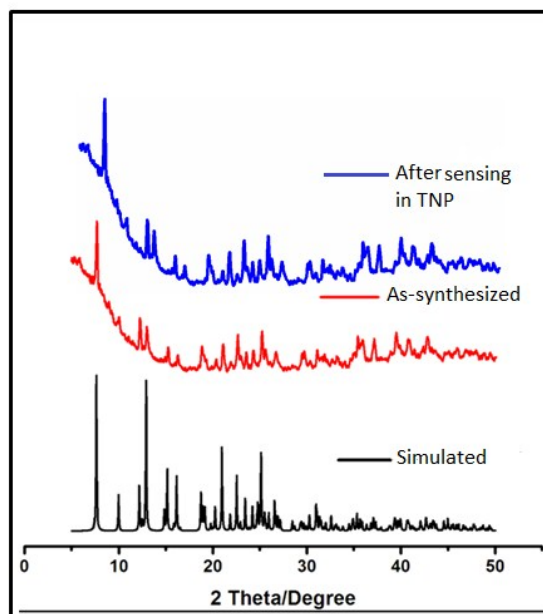

Fig. S10 PXRD patterns of simulated **1** (black), as-synthesized **1** (red) and after sensing of **1** in TNP (blue).

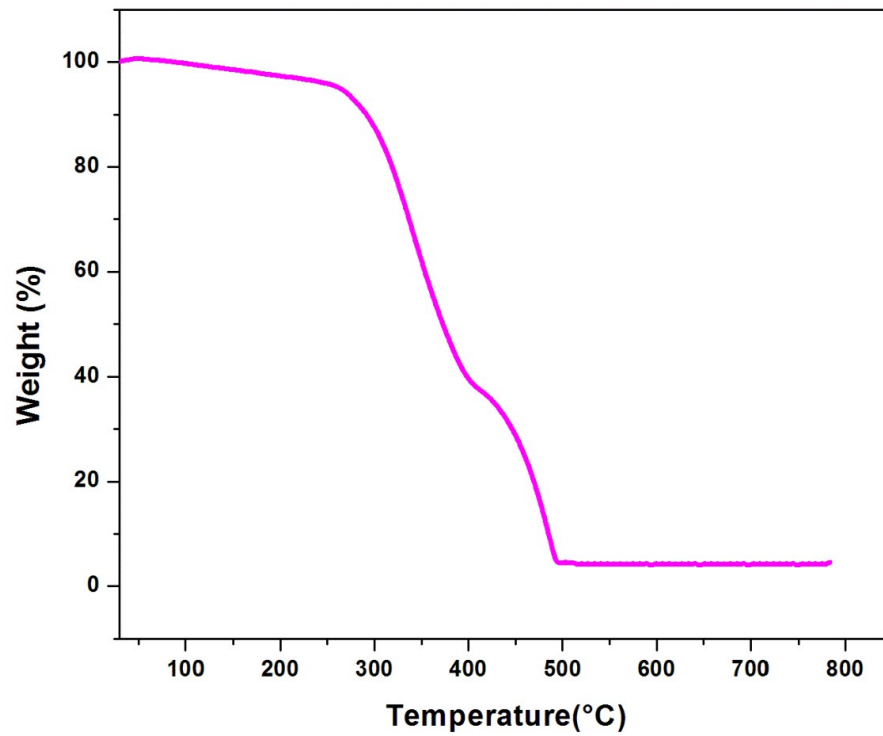

**Fig. S11** TGA plot of **1** (pink).
